# Supplementary material for: Atmospheric oxygen as a tracer for fossil fuel carbon dioxide: a sensitivity study in the UK
Source: Copernicus journal article supplement (doi:10.5194/egusphere-2023-385), 2023-06-14
Supplement: Supplementary file [file egusphere-2023-385-AC1-supplement.pdf]

# “Atmospheric oxygen as a tracer for fossil fuel carbon dioxide: a sensitivity study in the UK” – Response to Anonymous Referee #2

Hannah Chawner<sup>1</sup>, Karina Adcock<sup>2</sup>, Eric Saboya<sup>1,7</sup>, Tim Arnold<sup>3,4</sup>, Yuri Artioli<sup>5</sup>, Caroline Dylag<sup>3</sup>, Grant L. Forster<sup>2,6</sup>, Anita Ganesan<sup>7</sup>, Heather Graven<sup>8</sup>, Gennadi Lessin<sup>5</sup>, Peter Levy<sup>9</sup>, Ingrid T. Lujikx<sup>10</sup>, Alistair Manning<sup>11</sup>, Penelope A. Pickers<sup>2</sup>, Chris Rennick<sup>3</sup>, Christian Rödenbeck<sup>12</sup>, Matthew Rigby<sup>1</sup>.

<sup>1</sup>School of Chemistry, University of Bristol, Bristol, UK

<sup>2</sup>Centre for Ocean and Atmospheric Sciences, School of Environmental Sciences, University of East Anglia, Norwich, UK

<sup>3</sup>National Physical Laboratory, Teddington, UK

<sup>4</sup>School of Geosciences, University of Edinburgh, Edinburgh, UK

<sup>5</sup>Plymouth Marine Laboratory, Plymouth, UK

<sup>6</sup>National Centre for Atmospheric Sciences, University of East Anglia, UK

<sup>7</sup>School of Geographical Sciences, University of Bristol, Bristol, UK

<sup>8</sup>Department of Physics, Imperial College London, London, UK

<sup>9</sup>Centre for Ecology and Hydrology, Edinburgh, UK

<sup>10</sup>Meteorology and Air Quality, Wageningen University and Research, Wageningen, the Netherlands

<sup>11</sup>Hadley Centre, Met Office, Exeter, UK

<sup>12</sup>Max Planck Institute for Biogeochemistry, Germany

---

Below we describe the changes that have been made to the re-submitted manuscript “Atmospheric oxygen as a tracer for fossil fuel carbon dioxide: a sensitivity study in the UK” as recommended in the comments from the two reviewers.

Additional small changes that primarily relate to typos spotted by the authors have also been made and are listed towards the end of this document. Please note that these small additional changes made by the authors do not substantially affect the scientific findings.

Referee comments are stated in black with author responses in blue. Proposed changes to the manuscript are clearly stated throughout (usually in bold typeface).

---

## RC1 referee comments

Overall, this is a clear and thorough examination of the use of APO as a tool for quantifying fossil fuel CO<sub>2</sub> emissions. The authors have conducted numerous sensitivity studies and model comparisons and conclude that APO can't give robust estimates of fossil CO<sub>2</sub> emissions with our current knowledge of oceanic APO fluxes.

The reviewer is correct that our manuscript indicates a potentially substantial but highly uncertain contribution of oceanic fluxes to the simulated APO in the UK. The oceanic influence has not been previously demonstrated in these APO observations and remains to be further investigated. As demonstrated in the manuscript, model-data CO<sub>2</sub> and O<sub>2</sub> values are better correlated than the APO model-data comparison, indicating there is a specific challenge in APO model-data comparisons at least at the Weybourne and Heathfield sites. However, we must be careful that overly broad conclusions are not drawn from our work. Indeed, the preprint by Rödenbeck et al. (2023) *ACPD*, which was published after our manuscript was submitted, suggests that, given a network of sufficient density, fossil fuel flux estimates may be less strongly influenced by ocean fluxes, particularly for continental regions. We have checked the wording in our manuscript to ensure we are not inadvertently giving the impression that conclusions could readily be extended to other regions or network densities. We now include the following reference(s) to the Rödenbeck study.

At the end of “Section 3.4 Sensitivity to ocean flux” we include (shown in bold):

*“Based on our investigation we cannot determine which, if any, of the ocean flux estimates represent the APO contribution at sites in the UK. **Furthermore, we do not see a substantial difference in correlation between***

*the observations and either the simulations that include ocean fluxes or those that do not. Chevalier et al. (2021) also noted an ocean influence in their simulations using different transport models to those used here. Our result requires further investigation since the magnitude of some of the short-term ocean variability during the summer in NE and ED simulations is inconsistent with what is seen in the observations at WAO. Furthermore, it needs to be determined the extent to which these findings are due to the coastal location of WAO since some shipboard measurements do not show a large sensitivity to ocean fluxes (Pickers 2016). Rödenbeck et al. (2023) suggest that a dense continental network of stations measuring APO could minimize the potential influence of oceanic fluxes, meaning that robust estimates of fossil fuel CO<sub>2</sub> fluxes could be made by using observed APO gradients within a continent.”*

And in the conclusion:

*“Our analysis cannot determine which ocean model (or indeed, zero ocean flux) or baseline estimation method leads to closest agreement with the observations. However, a robust estimate of ffCO<sub>2</sub> is likely to depend strongly on these factors being well-known, or proven to have little influence using observation-based methods. We do not find evidence from our three UK stations that the substantial (yet uncertain) influence of oceanic fluxes on simulated APO is reduced further inland. But since the UK is surrounded by ocean, simulated APO at continental European locations may be less affected. More robust ffCO<sub>2</sub> estimates may be possible in general if a sufficiently dense network of sites were available, which could account for fossil fuel influences jointly with that of any oceanic sources.”*

The results here are important, the work is sound and the presentation is good. I have some corrections and suggestions to offer, but most of these are minor and I feel that the paper should definitely be published (after my concerns are addressed).

### **Three substantive matters come to mind that are worthy of attention:**

1. I am little concerned that there is no mention of the risk of circularity here: JC is an inversion that is based in part on the data from Weybourne. I would like to be convinced that the JC results give a background estimate that is truly independent of the record from which it is being subtracted.

The reviewer is correct that the JC APO fields, which we have used as a boundary condition, were derived in a global inversion in which Weybourne data were used. However, we are confident that any circularity will not have a significant impact on our results. This is because we only use these fields to examine the variability within each month due to APO gradients at the regional boundary (the absolute level is adjusted each month to ensure that the mean data and the model approximately agree). Since the domain boundary is on the order of ~1000km from the site, we expect that the JC gradients in that part of the atmosphere will only be minimally influenced by the inclusion of WAO.

We now address this comment in the manuscript by including the following sentence in Section 2.2.3:

*“... of APO mole fractions from the JC global APO inversion (Rödenbeck et al., 2008, version apo99X\_WAO\_v2021). Whilst the JC APO fields include data from WAO in their derivation, any circular influence on our results should be small, because the domain boundaries are far from the UK (~1000 km) and therefore, the WAO data should not strongly influence the gradients simulated there. These boundary conditions are ...”*

2. The abstract and introduction led me to believe all three sites (Weybourne, Heathfield & Ridge Hill) would play significant roles in this work. While Heathfield and Ridge Hill do add substance and breath to the analysis, the truth is that Weybourne is by far the most important site in this study and most references to the other two are relegated to the supplement. I would prefer that the secondary nature of Heathfield and Ridgehill was more explicitly acknowledged throughout. Anything else feels like bait-and-switch tactics.

We have included the following sentence in the abstract to underscore that the main model-data analysis was performed for one UK site with additional comparisons presented in the Supplementary Information.

“... from the NEMO-ERSEM and ECCO-Darwin ocean models, and the Jena CarboScope APO inversion. We focus our model-data analysis on the year 2015 as ocean fluxes were not available for later years. As APO measurements are only available for one UK site at this time, our analysis focuses on the Weybourne station. Model-data comparisons for two additional UK sites (Heathfield and Ridge Hill) in 2021, using ocean flux climatologies, are presented in the supplement. The sensitivity of APO to fossil fuel emissions ...”

And the following edit has been made to the last paragraph of the introduction.

“Two measurement sites equipped with high-frequency CO<sub>2</sub> and O<sub>2</sub> instruments have been established in the UK, one at Weybourne Atmospheric Observatory (WAO) in the east of England and one at Heathfield tower (HFD) in the south of England. In this paper, we perform simulations of CO<sub>2</sub> and O<sub>2</sub> primarily focussing on model-data comparisons at WAO for the year 2015, with further comparisons at HFD and WAO for the year 2021 presented in the supplement along with a third site at Ridge Hill (RGL) telecommunications tower. Although O<sub>2</sub> measurements are not available at RGL, it is included to examine the modelled APO further inland.”

3. Finally, the “future work” section is limited to developing better/more certain ocean fluxes. This ignores two possible avenues for exploration: a different species that might give insight into oceanic oxygen fluxes (noble gases?), or a different oxygen-based “tracer”. APO was originally formulated to eliminate terrestrial signals and be as sensitive as possible to oceanic oxygen fluxes. Any ability to learn about fossil CO<sub>2</sub> fluxes from APO is simply luck, capitalizing on the fact that  $\alpha_F \neq \alpha_B$ . However, these oxidative ratios aren’t actually very different. I am left wondering whether one would be better able to use oxygen for quantifying fossil CO<sub>2</sub> fluxes by combining O<sub>2</sub> and CO<sub>2</sub> into a tracer that was minimally sensitive to oceanic fluxes and then use terrestrial models (which might be better constrained than oceanic models, in this context) to take out the land contribution, leaving a more robust fossil signal. I recognize that actually doing this work is well beyond the scope of this study, but a brief mention of these alternative approaches (or others) would make the “future work” section much less *pro forma*.

We have reworked this section slightly to highlight that this is a modelling study, which could now pave the way to further observation-based analysis of these important datasets. We have also noted that tracers of ocean fluxes could be sought to help understand some of the issues discussed in the manuscript (although the precise nature of what might be practical or useful here is beyond our expertise).

Regarding combining O<sub>2</sub> and CO<sub>2</sub> into a tracer that is minimally sensitive to ocean fluxes, to our knowledge, this would not be possible. Unlike for land processes, where they are strongly coupled, O<sub>2</sub> and CO<sub>2</sub> fluxes from the ocean are largely decoupled, as we mention in the introduction. This partly arises because CO<sub>2</sub> dissociates to bicarbonate and carbonate ions when it dissolves in seawater, whilst gases such as O<sub>2</sub> are not very soluble in water, thus changing the balance of carbon between the ocean and atmosphere according to Henry’s law. As such, the air-sea equilibrium time for each gas is very different – about 1 year for CO<sub>2</sub> and only a few weeks for O<sub>2</sub> (Keeling and Shertz, 1992). In addition, biological and solubility driven fluxes for CO<sub>2</sub> largely cancel each other in most ocean regions, whereas for O<sub>2</sub>, these fluxes are reinforcing (Stephens et al., 1998).

#### **A few minor requests for elaboration or clarification:**

4. Line 56: I would like to see a sentence comparing this work to the studies of Kuijpers and CHE. State your expectations for the UK sites. Do you expect to see what other studies saw, or do you expect to be more sensitive to, for example, marine influences?

Whilst we agree it is important the implications of this study are compared with the existing literature, we feel this comparison would be better placed when we are discussing our results. We have included the following lines:

Section 3.2 (sensitivity to exchange ratios): “Chevalier et al. (2021) also identified an influence on the simulated APO due to potential misspecification of  $\alpha_B$ .”

Section 3.4 (sensitivity to ocean flux): *“Chevalier et al. (2021) also noted an ocean influence in their simulations using different transport models to those used here.”*

5. Line 213-214: If this is a period of minimal terrestrial influence, why are you comparing to a simulation with no ocean fluxes? Perhaps this is a standard modelling practice, but without more detail, I don't understand what is meant by “the 90 percentile of APO in a simulation with no ocean fluxes”, nor how it defines a period of minimal terrestrial influence.

The idea here is to estimate an “offset” that can be applied to the model simulations in each month, so that the baseline is approximately consistent with the atmospheric data. This is necessary because we only have a regional model, so need to account for the regional background, and we don't want to be reliant on hard-wiring background levels from another inversion product (see response to Point 1). For long-lived trace gases, we often use regional model simulations to estimate data points that are minimally influenced by sources of the gas of interest (which are typically land-based) and infer the baseline from measurements made at those times (e.g., Manning et al., 2021, 2011). Here, we've attempted to do the same for APO by running a simulation with no ocean flux, and then finding the data points with the smallest deviation from zero (i.e., the highest APO values, since the deviations are negative).

The problem with this approach is that it relies on these points being close to the regional background in the observations. However, as the paper shows, for APO at WAO, even when the influence of land-based sources is minimised, there may be a deviation from the baseline because of ocean fluxes. Because of these potential issues, we investigate the influence of using different baseline estimation methods in Section 3.5.

6. Lines 229ff: As I understand it, you are asking “If the actual emissions of ffCO<sub>2</sub> go up or down, will we capture those variations if we start with APO and infer the ffCO<sub>2</sub> emissions?”. However, instead you state: “we study the sensitivity of the modelled fossil fuel contribution to the atmospheric concentration of CO<sub>2</sub> and O<sub>2</sub>”. I believe you are using “modelled fossil fuel contribution” for the value of ffCO<sub>2</sub> inferred from APO, and “the atmospheric concentration of CO<sub>2</sub> and O<sub>2</sub>” is actually the variation in atmospheric CO<sub>2</sub> and O<sub>2</sub> mole fractions arising solely from fossil fuel combustion. If I am correct, I find your wording very confusing. If I am not correct, I am truly confused. Either way, please clarify.

The reviewer is correct that the wording is confusing here. We have modified this section to read:

*“We estimate the sensitivity of the modelled APO to changes in the distribution and magnitude of fossil fuel CO<sub>2</sub>. We investigate the influence of the spatial distribution by comparing APO simulations for the NAEI and EDGAR, which are overall very similar in magnitude, but have a different distribution (Figure 2). As discussed in Section 2.2, our APO model uses NAEI ffCO<sub>2</sub> emissions estimates for the UK, which are embedded in those of EDGAR and combined with NAEI fuel usage statistics to calculate ffO<sub>2</sub> uptake. We compare these estimates to EDGAR CO<sub>2</sub> emissions with GridFED  $\alpha$ F.”*

*We investigate the sensitivity of the APO model to the magnitude of ffCO<sub>2</sub> using a Monte Carlo ensemble in which the overall CO<sub>2</sub> flux in the entire domain is allowed to vary by  $\pm 10\%$ . This range is considerably larger than the difference between EDGAR and the NAEI, which is approximately 0.7%, but chosen so that the effect on APO can be readily identified.”*

7. Lines 249ff: Again, only after close study do I *think* I understand what you're doing here. I believe the crucial point here is that “modelled  $\Delta(\delta\text{APO})$  (Calculated using equation 5)” is a fully-modelled based prediction of the change in APO that results solely from sources and sinks *within the region*. If I am correct about this, please state it more explicitly.

This is correct. We have reworded the first few lines of this subsection to make this clearer:

*“As our APO simulations only account for the influence of fluxes within our regional domain, an estimate must be made of the APO entering the domain. Therefore, in this section, we describe how different background estimates might influence the comparison between the APO simulation and the observations. The background represents the APO variability that is representative of the well-mixed atmosphere at the UK’s latitude, excluding local influences. We compare the modelled  $\Delta(\delta APO)$  ...”*

### **Very minor editorial points**

8. Line 12: should read “contribution of simulated fossil fuel CO<sub>2</sub> to APO”

This has now been corrected in the manuscript.

9. Line 37: New paragraph beginning “When considering ocean fluxes ...”

This has now been corrected in the manuscript.

10. Lines 61 & Eq. 1: The spacing in “reference” is odd. Maybe this is just a quirk of latex. Did you use  $\mathit$  for the subscript.

We believe this was a quirk of LaTeX, but we have adjusted the spacing so that it looks more conventional.

11. Lines 75 and following: Please be a little more explicit about the units in these eqs. In particular, it requires some work for the reader to determine whether  $\Delta(\delta APO)$  is a difference (in permeg) or a flux (in permeg/yr) of some other units.

We have clarified in the text preceding Eq. 4-5 that  $\Delta(\delta APO)$  represents deviations of APO from the baseline expressed in per meg. To make this clear, we have adjusted how Eq. 4-5 are presented so that they i) match the derivation of Manning and Keeling (2006) and ii) use the same notation (i.e. changing SO<sub>2</sub> to X<sub>O2</sub>). Where an additional term to correct for dilution effects of atmospheric O<sub>2</sub> is included, we remove this term as this was not used in the modelling of APO.

12. The citation of Pickers is incomplete.

This has now been corrected in the manuscript.

13. “Variations in ...” is a run-on sentence. A new one should begin at “however”.

This has now been corrected in the manuscript.

14. Line 144: Should read “for the influence of rapid variations in CO<sub>2</sub> flux on mole fractions, footprints are ...”

This has now been corrected in the manuscript.

15. Figure 3 caption: I assume panel D shows the footprint for WAO. This is not stated in the caption.

We have specified in the caption that the footprint in Fig. 3d is for WAO.

16. Figure 4: In the figure caption, the distinction between groups of panels (a,b,c vs., d,e,f) is opaque. In my mind, there is no meaningful difference between “regional contribution” and “overall regional [contribution]”. I believe you have just combined the four respective sets of tracers for CO<sub>2</sub> and O<sub>2</sub> in a,b,c (with appropriate weighting) to APO in d,e,f. The word “overall” does not convey this relationship. Please make this easier to discern from the caption.



We agree that as worded this is confusing. To make this clearer for the reader we have changed “*regional*” contribution to “*gas-specific sectoral*” contribution in the first instance. We have changed “*overall regional*” to “*APO*” in the second instance.

17. Line 320: “The APO model...”. Exactly which model? By eye it’s not obvious which lines have been included in the average, yielding the quoted  $R^2$  value of 0.24 for December.

Here, “*APO model*” refers to all APO simulations that are presented rather than one specific simulation or subset of simulations that impose different data filtering. This has now been changed in the manuscript to now read “*all APO simulations*”.

Please note, the  $R^2$  and RMSE values presented in the text of the manuscript appear to be typos when compared to the Python code output for the mean  $R^2$  and RMSE values of the APO simulations. The mean  $R^2$  and RMSE for August 2015 (all simulations) should be: 0.1 and 8.4, respectively. The mean  $R^2$  and RMSE for December 2015 (all simulations) should be: 0.3 and 7.1, respectively. We have corrected these in the main text.

For reference:

|                  | August 2015 |             | December 2015 |             |
|------------------|-------------|-------------|---------------|-------------|
|                  | $R^2$       | RMSE        | $R^2$         | RMSE        |
| All data         | 0.09        | 8.98        | 0.27          | 7.01        |
| Daytime filtered | 0.07        | 8.81        | 0.36          | 6.22        |
| Ocean filtered   | 0.14        | 7.49        | 0.36          | 8.12        |
| <b>Average</b>   | <b>0.10</b> | <b>8.43</b> | <b>0.34</b>   | <b>7.12</b> |

18. Figure 6 caption: Is there a superfluous “and” in the 3<sup>rd</sup> line?

This has now been corrected in the manuscript.

19. Line 340: The correspondence between  $\alpha_f$  and  $\alpha_b$  in panels of Fig. 7 is not as stated and it’s not simple to state correctly, so just “the top and bottom panels of” and “respectively”.

We agree that this was written in a confusing manner and have amended as suggested.

“... sensitivity of APO to  $\alpha_b$  and  $\alpha_f$  is shown in the top and bottom panels of Figure 7, respectively”.

Now reads:

“... sensitivity of APO to  $\alpha_b$  and  $\alpha_f$  is shown in ~~the top and bottom panels of~~ Figure 7, respectively”.

20. Table 1: The extension of the vertical line (in the column headings) separating August 2015 from December 2015 is in the wrong place.

This has now been corrected in the manuscript.

21. Line 413: Should “large-timescale” really be “long-timescale”?

This has now been corrected in the manuscript to read “long-timescale”.

22. Figures 6 & 10: In the first case you simply say “ $R^2$ ” and in the second you say “The Pearson correlation coefficient  $R^2$ ”. Either switch the order (giving a more complete introduction and subsequent abbreviation) or just stick with the simpler  $R^2$  in both cases.

Thank you, this is a good point. We have removed “The Pearson correlation coefficient” from the caption of Fig. 10 and only use  $R^2$  in both Fig. 6 and Fig. 10.

---

### **Additional changes made by the authors.**

In addition to small changes in the wording of the manuscript text, that are detailed in the tracked changes document, the following changes of note have been made to the manuscript.

1. A typo on the left-hand-side term of Eq. 3 in the manuscript has been corrected from “APO” to “ $\delta$ APO”.
2. We have adjusted Eq. (4-5) to match the derivation presented in Manning and Keeling (2006) and to use the same notation. We introduce Eq. (6), formerly Eq. (5), that includes the correction term for atmospheric  $O_2$ . This has been done to make it clear where this term of  $1/(1-X_{O_2})$  comes from as it is not included in the derivation presented in Manning and Keeling (2006)
3. Errata on line 45: The thesis of Kuijpers modelled atmospheric  $O_2$  for autumn of **2014** and compared simulations with observations from **two** sites.
4. Figure 13. In the text this is described as “The correlations ( $R^2$ ) between the observation-derived  $ffCO_2$  and the  $ffCO_2$  model” but the figure caption are in per meg, not  $ffCO_2$  in ppm. We have corrected the figure label and caption.
